# 1 **Chemotherapeutic Nanoparticles Accumulate in the Female Reproductive System** 2 **during Ovulation Affecting Fertility and Anticancer Activity**

3 Maria Poley<sup>1</sup>, Yael Shammai<sup>1</sup>, Maya Kaduri<sup>1</sup>, Lilach Koren<sup>1</sup>, Omer Adir<sup>1,2</sup>, Jeny Shklover<sup>1</sup>, Janna  
4 Shainsky<sup>1</sup>, Irit Ben-Aharon<sup>3,4</sup>, Assaf Zinger<sup>5,6</sup> and Avi Schroeder<sup>1,\*</sup>

5  
6 <sup>1</sup>Laboratory for Targeted Drug Delivery and Personalized Medicine Technologies, Department of  
7 Chemical Engineering, Technion – Israel Institute of Technology, Haifa 32000, Israel

8 <sup>2</sup>The Norman Seiden Multidisciplinary Program for Nanoscience and Nanotechnology, Technion – Israel  
9 Institute of Technology, Haifa 32000, Israel

10 <sup>3</sup>Oncology, Rambam Health Care Center, 3109601 Haifa, Israel

11 <sup>4</sup>Technion Integrated Cancer Center, Faculty of Medicine, Technion, 320000, Haifa, Israel

12 <sup>5</sup>Center for Musculoskeletal Regeneration, Houston Methodist Academic Institute, TX, USA

13 <sup>6</sup>Orthopedics and Sports Medicine, Houston Methodist Hospital, TX, USA

14

15 \*To whom correspondence should be addressed: A.Z. [ayzinger@houstonmethodist.org](mailto:ayzinger@houstonmethodist.org), A.S.

16 [avids@technion.ac.il](mailto:avids@technion.ac.il)

17

## 18 **Abstract**

19 Throughout the female menstrual cycle, physiological changes occur that affect the biodistribution of  
20 nanoparticles within the reproductive system. This can have positive or negative effects. We demonstrate  
21 a 2-fold increase in nanoparticle accumulation in the ovaries during female mouse ovulation compared to  
22 the non-ovulatory stage following intravenous administration. Accumulation in the reproductive system  
23 is favored by nanoparticles smaller than 100 nm. Chemotherapeutic nanoparticles administered during  
24 ovulation increased ovarian toxicity and decreased short-term and long-term fertility when compared to  
25 the free drug. Breast cancer treated with nanomedicines during ovulation results in higher drug  
26 accumulation in the reproductive system rather than at the site of the tumor, reducing treatment efficacy.  
27 Conversely, ovarian cancer treatment was improved by enhanced nanoparticle accumulation in the ovaries  
28 during ovulation. Our findings suggest that the menstrual cycle should be considered when designing and  
29 implementing nanotherapeutics for females.

30

31 **Keywords:** female, sex nanotechnology, fertility, ovarian cancer, breast cancer, nanoparticle

## 32 **Introduction**

33 The effect of the menstrual cycle on nanoparticle biodistribution and activity is overlooked in the study of  
34 therapeutic nanotechnologies. The female reproductive system, which harbors the egg reservoir,  
35 undergoes cyclic hormonal and physiological changes that lead to ovulation<sup>1</sup>. During the pre-ovulatory  
36 stage, increased blood flow, angiogenesis and perfusion within the reproductive system support oocyte  
37 maturation, with consequences for nanoparticle distribution (Figure 1a)<sup>1,2</sup>. For female mice, the estrous  
38 cycle (the equivalent of the human female menstrual cycle) is divided into four stages: diestrus, proestrus,  
39 estrus, and metestrus<sup>3</sup>. At the end of the proestrus stage, ovulation occurs, followed by the estrus stage.

40 Nanotechnologies are becoming important clinical tools, allowing accurate diagnosis and therapy<sup>4-10</sup>.  
41 Several nanotherapeutic drugs are currently in clinical use for treatment of female-specific cancers, such  
42 as ovarian cancer<sup>11,12</sup>. Nanoparticle distribution to the female reproductive system can improve the  
43 efficacy of cancer treatments or pose a threat to fertility by causing ovarian toxicity and subsequent ovarian  
44 failure<sup>13-16</sup>.

45 There has been a recent increase in attention towards sex-specific medicine<sup>17</sup>. Foci include the study of  
46 female-specific administration routes, such as vaginal delivery<sup>18-20</sup>, and evaluation of sex differences in  
47 pharmacokinetic parameters of clinically-approved nanomedicines<sup>21</sup>. PEGylated liposomal doxorubicin  
48 has a slower overall clearance rate in females than in males<sup>21</sup>. The reason behind this sex-related difference  
49 is yet to be determined. It has recently been demonstrated that the cellular uptake of nanoparticles is  
50 dependent on the cell sex identity<sup>22</sup>. Preclinical characterization of nanoparticle biodistribution and  
51 pharmacokinetic parameters is therefore an important step in the development of nanocarriers, especially  
52 given the wide variety of nanoparticle types and applications<sup>23-27</sup>. Here, we study how the female  
53 menstrual cycle affects the accumulation of nanoparticles in the reproductive system. We then explore the  
54 effect of nanomedicines on female fertility and determine how the efficacy of nanomedicines is affected  
55 by the stages of the menstrual cycle.

56

## 57 **Results and Discussion**

58 The female reproductive system undergoes cyclic physiological changes timed with the monthly  
59 menstrual cycle. One of these changes is the formation of new blood vessels around developing follicles

60 before ovulation (Figure 1a, b). We studied the accumulation of nanoparticles in developing follicles  
61 before, during, and after ovulation using  $80\pm 10$  nm liposomes loaded with gadolinium (Gd-lipo, Figure  
62 1c, d) in female mice.

63 **Maximal nanoparticle accumulation in the reproductive system was measured during ovulation.**

64 The menstrual cycle of the female mouse is divided into four stages: diestrus, proestrus, estrus, and  
65 metestrus. The cycle stage was determined using vaginal cytology (Figure S1a). Gd-lipo or free Gd were  
66 injected intravenously (i.v.) (Figure 1e) to the tail vein of the mice at each of the four stages. 24 hours  
67 after the injection, accumulation of either Gd-lipo or free Gd in the ovaries (Figure 1f) and the uterus  
68 (Figure 1g) was quantified using elemental analysis. Maximal accumulation of Gd-lipo was assessed  
69 during the estrus stage for the ovaries ( $2.2\%\pm 0.17$  of the injected dose,  $n=9$ ) and the uterus ( $5.3\% \pm 0.6$  of  
70 the injected dose,  $n=8$ ). The lowest accumulation occurred during the diestrus stage, where only  
71  $1.25\%\pm 0.07$  ( $n=9$ ) and  $2.1\%\pm 0.3$  ( $n=7$ ) of the injected dose reached the ovaries and the uterus,  
72 respectively. This amounts to a  $\sim 2$ -fold ( $p<0.0001$ ) and  $\sim 2.5$ -fold ( $p<0.0001$ ) increase in Gd-lipo  
73 accumulation during the estrus stage compared to the diestrus stage at the ovaries and uterus, respectively.  
74 The accumulation during the proestrus ( $1.5\%\pm 0.2$ ,  $n=10$  for ovaries,  $3.8\% \pm 0.4$   $n=11$  for uterus) and the  
75 metestrus ( $1.7\%\pm 0.1$   $n=10$  for ovaries,  $3.2\%\pm 0.5$   $n=8$  for uterus) stages was significantly lower than  
76 during the estrus stage. In both the uterus and the ovaries, throughout the estrous cycle stages, the amount  
77 of free Gd compared to Gd-lipo was significantly lower ( $p<0.0001$ ), indicating that the quantified Gd from  
78 the liposome-treated mice was due to liposomal accumulation. No significant differences in liposomal  
79 accumulation were found in the heart, lungs, kidneys, and spleen (Figure 1h) excluding the liver where a  
80 significant rise in liposomal accumulation was recorded during the proestrus stage compared to the  
81 diestrus, estrus or metestrus stages ( $p<0.05$ ). This increase may be related to elevated estrogen levels  
82 during proestrus and its effect on cytochrome P450 liver metabolism<sup>28</sup>.

83 To further assess the enhanced nanoparticle accumulation during estrus, we visualized the reproductive  
84 tract 24 hours after an i.v. injection of 80 nm cy5-labeled liposomes (Figure 1i). The fluorescent intensity  
85 in the ovaries was highest during the estrus stage compared to the diestrus, proestrus, and metestrus stages  
86 (Figure 1i). These results are in agreement with the quantitative Gd-lipo biodistribution results shown  
87 above.

88 **Increased blood vessel density during the ovulatory stage.** At the time of follicle development, as  
89 preparation for ovulation, new blood vessels are formed in the thecal layer surrounding the follicle<sup>29</sup>. To  
90 validate the increase in blood vessel density around developing follicles during the ovulatory stages,

91 immunohistochemistry against CD31 was performed (marked with a white dashed line in the image insert,  
92 Figure 1j, k), and staining intensity was quantified (Figure 1l). The coverage of CD31 positive cells in the  
93 thecal layer is 4-fold higher during the estrus stage compared to the diestrus stage (Figure 1l,  $p<0.0001$ ).  
94 The increased vascularity during the estrous cycle is restricted to the reproductive system, driven by  
95 vascular endothelial growth factor (VEGF) secretion<sup>1</sup>. Higher VEGF levels also lead to capillary leakiness  
96 and increased permeability, thus enabling nanoparticle extravasation through large endothelial gaps that  
97 are present during the proestrus and estrus stages<sup>30</sup>.

98 **Nanoparticle accumulation in the reproductive system is size-dependent.** To test whether the ovaries  
99 have a nanoscale size cutoff, PEGylated gold nanoparticles (AuNPs) of different sizes: 20, 50, 100, and  
100 200 nm were injected intravenously during the estrus stage<sup>31</sup>. Accumulation of AuNPs in the ovaries and  
101 the uterus was quantified 24 hours post-injection using elemental analysis (Figure 2a). After 24 hours,  
102 2.1%±0.2 of the injected dose normalized to the tissue weight was quantified in the ovaries for 20 nm  
103 AuNPs and 1.9%±0.1 for 50 nm AuNPs were detected in the ovaries. Contrarily, only 0.9%±0.1 or  
104 0.4%±0.02 of the 100 nm and 200 nm AuNP, respectively, reached the ovaries (Figure 2a). In a similar  
105 pattern, 20 and 50 nm AuNPs accumulated in higher doses at the uterus compared to 100 and 200 nm  
106 (Figure 2a). In summary, 100 nm AuNPs accumulated ~2-fold less in the ovaries ( $p<0.05$ ) and ~3.5-fold  
107 less in the uterus ( $p<0.05$ ) compared to smaller AuNPs sizes, while 200 nm AuNPs accumulated ~5-fold  
108 less in the ovaries ( $p<0.01$ ) and ~12.5-fold less in the uterus ( $p<0.01$ ) compared to smaller AuNPs sizes.

109 **80-nm liposomes are restricted outside the blood-follicle barrier.** The blood-follicle barrier (BFB)  
110 forms during the early follicle stage and remains as a protective biological barrier until ovulation, at which  
111 point the barrier ruptures to release the oocyte<sup>32</sup>. Changes in the BFB structure throughout the follicular  
112 development allow strict regulation of the follicular fluid composition. The BFB protects the developing  
113 oocyte from toxic and foreign molecules while supplying it with necessary nutrients and growth factors<sup>33</sup>.  
114 24 hours post i.v. injection, 80-nm liposomes were found surrounding the follicle, specifically at the outer  
115 thecal layer (Figure 2b, c). Fluorescence intensity measurements across a single follicle demonstrated that  
116 the liposomal signal is restricted outside the follicle, signified by two distinct peaks, with baseline signal  
117 recorded inside the follicle itself (Figure 2d), suggesting that 80 nm liposomes do not cross the BFB  
118 (Figure 2e).

119 **Doxorubicin-loaded liposomes cause delayed ovarian toxicity.** We evaluated the effect of liposomal  
120 doxorubicin versus free doxorubicin on ovarian toxicity<sup>13</sup>. Healthy female mice received an i.v. injection

121 of either free doxorubicin (free-DOX) or doxorubicin-loaded liposomes (DOX-lipo) during the estrus and  
122 diestrus stages (Figure 3a). After 24 or 48 hours, the ovaries were collected and RT-PCR analysis of pro-  
123 and anti-apoptotic genes was performed. Ovarian toxicity was recorded in all the experimental groups  
124 compared to the non-treated control (Figure 3b). The highest apoptosis level was measured 24 hours after  
125 free-DOX injection during estrus ( $R=2.7 \pm 0.2$ ,  $n=3$ , ratio between pro and anti-apoptotic gene expression  
126 normalized to healthy mice), and was significantly higher ( $p<0.05$ ) compared to injection during the  
127 diestrus stage ( $R=1.5 \pm 0.08$ ,  $n=2$ ). Furthermore, apoptosis levels 24 hours after injection at the estrus  
128 stage were ~1.5-fold higher for the free-DOX group compared to the DOX-lipo group ( $p<0.05$ ).  
129 Immunohistochemistry analysis confirmed that the apoptotic effect took place inside the follicles (Figure  
130 3c, d). Anti-active caspase3 staining was used to detect apoptotic follicles 4, 24, and 48 hours after  
131 injection of either free-DOX or DOX-lipo injected mice. At all time-points, the larger the follicle the  
132 greater the apoptosis levels were (Figure S1b, S1c). This agrees with the fact of increased blood supply to  
133 larger follicles<sup>34</sup>, and therefore increased drug exposure. After 24 hours, free-DOX treated mice had  
134 significant apoptosis in both small and large follicles (Figure 3c), compared to the DOX-lipo treated  
135 ovaries which showed no apoptotic signs in the smaller follicles (Figure 3d). The overall percentage of  
136 apoptotic follicles (Figure 3e) after 4 hours was slightly higher for the free-DOX treated ovaries ( $36\% \pm$   
137  $5.6$ ,  $n=5$ ) compared to the DOX-lipo group ( $28\% \pm 3.3$ ,  $n=3$ ). After 24 hours, the percentage of overall  
138 apoptotic follicles increased significantly ( $p<0.0001$ ) for the free-DOX treated group ( $64\% \pm 10$ ,  $n=4$ )  
139 compared to the DOX-lipo group, which remained constant ( $32\% \pm 10$ ,  $n=5$ ). Surprisingly, after 48 hours,  
140 there was no significant increase in apoptosis in the free-DOX group ( $69\% \pm 9$ ,  $n=5$ ) while the percentage  
141 of apoptotic follicles spiked significantly ( $p<0.0001$ ) in the ovaries of DOX-lipo treated mice ( $70\% \pm 5$ ,  
142  $n=5$ ). Free-DOX was previously shown to cross the BFB and damage the developing oocytes<sup>13,35</sup>. These  
143 results suggest the delayed toxic effect of the DOX-lipo is due to initial liposomal accumulation in the  
144 ovaries, followed by drug release that induces the toxicity.

145 **Treatment with doxorubicin-loaded liposomes impairs fertility compared to the free drug.** We  
146 further explored the effect of nanoparticulate doxorubicin on fertility. Healthy female mice were divided  
147 into three groups: free-DOX treated, DOX-lipo treated, and non-treated control. The two treatment groups  
148 received three rounds of weekly i.v. injections and their cycle stage was monitored daily (Figure 3f). After  
149 three treatments, the females were housed with male mice for mating. The day of birth was monitored in  
150 addition to the litter size, pups' weights and viability after birth. The toxic effect of both DOX and DOX-  
151 lipo was apparent during the treatments as the estrous cycle was disrupted in the DOX-lipo treated group

152 (Figure 3h) and the free-DOX treated group (Figure 3i), compared to the control group where the estrous  
153 cycle remained normal. All mice (100%) in the control group had successful births  $26 \pm 2$  (n=9) days after  
154 mating onset (Figure 3j). In contrast, time until first litter was  $59 \pm 24$  days (n=10) for the free-DOX treated  
155 group and  $62 \pm 10$  days (n=10) in DOX-lipo group. Furthermore, while all mice in the free-DOX group  
156 were pregnant and gave birth (100% births), only 70% of the mice in the DOX-lipo group conceived. This  
157 implies that the mice in the DOX group regained their ability to ovulate. The average litter size was  $5 \pm 1.4$   
158 pups,  $5.3 \pm 1.9$ , and  $4.3 \pm 2.7$  for the control, free-DOX, and DOX-lipo group, respectively. The viability of  
159 the pups was 100% and  $90\% \pm 10\%$  for the control and the free-DOX groups respectively while it declined  
160 to merely  $60\% \pm 14\%$  for the DOX-lipo group ( $p < 0.05$ ). These results suggest that the treatment with DOX-  
161 lipo increases ovarian toxicity compared to free-DOX. This can be explained by the long retention time  
162 of the liposomes in the ovaries compared to free molecule drugs that are cleared rapidly<sup>36</sup>.

163 **The estrous cycle affects tumor biodistribution and nanomedicine therapy.** Nanomedicine treatments  
164 are used as first-line therapies against several types of cancer<sup>37,38</sup>. We tested the effect of the ovulatory  
165 cycle on nanoparticle accumulation in tumors and the reproductive system. For this, we measured the  
166 biodistribution of 80-nm liposomes during estrus and diestrus stages in mice bearing orthotopic triple-  
167 negative breast cancer (4T1) tumors (Figure 4a) or epithelial ovarian cancer (Figure 4b). Gd-lipo, 80 nm,  
168 were i.v. injected to tumor-bearing mice and their accumulation was quantified 24 hours after injection.  
169 In the breast cancer model, 2.6-fold more liposomes accumulated in the reproductive system compared to  
170 the tumor during the estrus stage ( $p < 0.05$ ). Interestingly, 4.1-fold more liposomes accumulated at the  
171 tumor compared to the reproductive system during the diestrus stage ( $p < 0.01$ ), indicating an opposite  
172 trend. These results suggest that during the estrus stage, the accumulation of nanoparticles is shifted  
173 towards the reproductive system rather than the tumor (Figure 4a).

174 In the case of ovarian cancer,  $2.7\% \pm 0.15$  (n=6) of the injected dose accumulated at the tumor-bearing  
175 ovary while  $2.1\% \pm 0.14$  (n=7) reached the neighboring healthy ovary at the time of estrus. This 1.3-fold  
176 difference ( $p < 0.01$ ) implies that cancer vascularization in the tumor-bearing ovary overcomes ovulation  
177 angiogenesis in the healthy ovary during the estrus stage.

178 We then tested the efficacy of DOX-lipo treatment on these cancer models during estrus and diestrus  
179 stages. Triple-negative breast cancer tumor-bearing mice were treated weekly with an intravenous  
180 administration of DOX-lipo, either during the estrus stage or diestrus stage, for three treatment cycles  
181 (Figure 4c, d). After 21 days, the average tumor size in the estrus group increased by  $276\% \pm 58$  compared

182 to day 0, while in the diestrus-treated group the tumor reduced to  $72\% \pm 6$  of the initial size ( $p < 0.0001$ ,  
183 Figure 4c). This result correlates with the biodistribution profile during the estrus stage, in which the  
184 nanomedicine preferentially accumulated in the reproductive system rather than at the tumor, resulting in  
185 decreased therapeutic efficacy.

186 When the reproductive system is the target of the nanomedicine treatment, as in ovarian cancer, the  
187 outcome is different. Treatment of ovarian cancer with DOX-lipo was favorable during the estrus stage  
188 compared to the diestrus stage (Figure 4e, f). After 14 days, the average tumor size of the diestrus group  
189 was ~1.6-fold higher than the average tumor size of the estrus group, as more liposomes reach the tumor-  
190 bearing ovary during ovulation thus increasing efficacy. This finding can be leveraged as a treatment  
191 strategy to increase nanomedicine accumulation in ovarian tumors for women that are still of reproductive  
192 age, while also accounting for possible effects on fertility.

193

## 194 **Conclusions**

195 Our findings show that the menstrual cycle affects the biodistribution of therapeutic nanoparticles towards  
196 the female reproductive system. Proper sex considerations in preclinical studies and clinical trials are  
197 encouraged<sup>39</sup>, however in the field of nanotechnology these considerations are still nascent. Nanoparticle  
198 accumulation during the estrous cycle should be considered in future studies, as it may lead to increased  
199 variability in biodistribution and drug efficacy. Our findings on possible ovarian toxicity caused by DOX-  
200 lipo compared to free-DOX should be taken into consideration when devising a treatment plan for patients  
201 in their reproductive age. These findings may also be leveraged for designing targeted treatments of the  
202 ovarian follicles for controlled drug release in this essential tissue of life.

203

## 204 **Acknowledgments**

205 This work was supported by ERC-STG-2015-680242.

206 Maria Poley wishes to thank the Israeli Ministry of Science and Technology for the Shulamit Aloni  
207 Doctoral Fellowship. Omer Adir wishes to thank the Miriam and Aaron Gutwirth Memorial Fellowship.  
208 Maya Kaduri wishes to thank TEVA Pharmaceuticals - NFBI - The National Forum for BioInnovators for

209 a doctoral grant and the Technion Integrated Cancer Center (TICC) Rubinstein scholarship. The authors  
210 also acknowledge the support of the Technion Integrated Cancer Center (TICC), the Russell Berrie  
211 Nanotechnology Institute, the Lorry I. Lokey Interdisciplinary Center for Life Sciences & Engineering,  
212 The Israel Ministry of Economy for a Kamin Grant (52752, 69230); the Israel Ministry of Science  
213 Technology and Space – Office of the Chief Scientist (3-11878); Israel Innovation Authority for Nofar  
214 Grant (67967), the Israel Science Foundation (1778/13, 1421/17); the Israel Ministry of Science &  
215 Technology (3-16963, and Covid-19 grant) ; the Israel Cancer Association (2015-0116); the German-  
216 Israeli Foundation for Scientific Research and Development for a GIF Young grant (I-2328-  
217 1139.10/2012); the European Union FP-7 IRG Program for a Career Integration Grant (908049); the  
218 Phospholipid Research Center Grant; the Louis family Cancer Research Fund, a Mallat Family Foundation  
219 Grant; The Unger Family Fund; a Carrie Rosenblatt Foundation for Cancer Research, A. Schroeder  
220 acknowledges Alon and Taub Fellowships. Images in this paper were created with BioRender.com and  
221 Adobe Illustrator.  
222



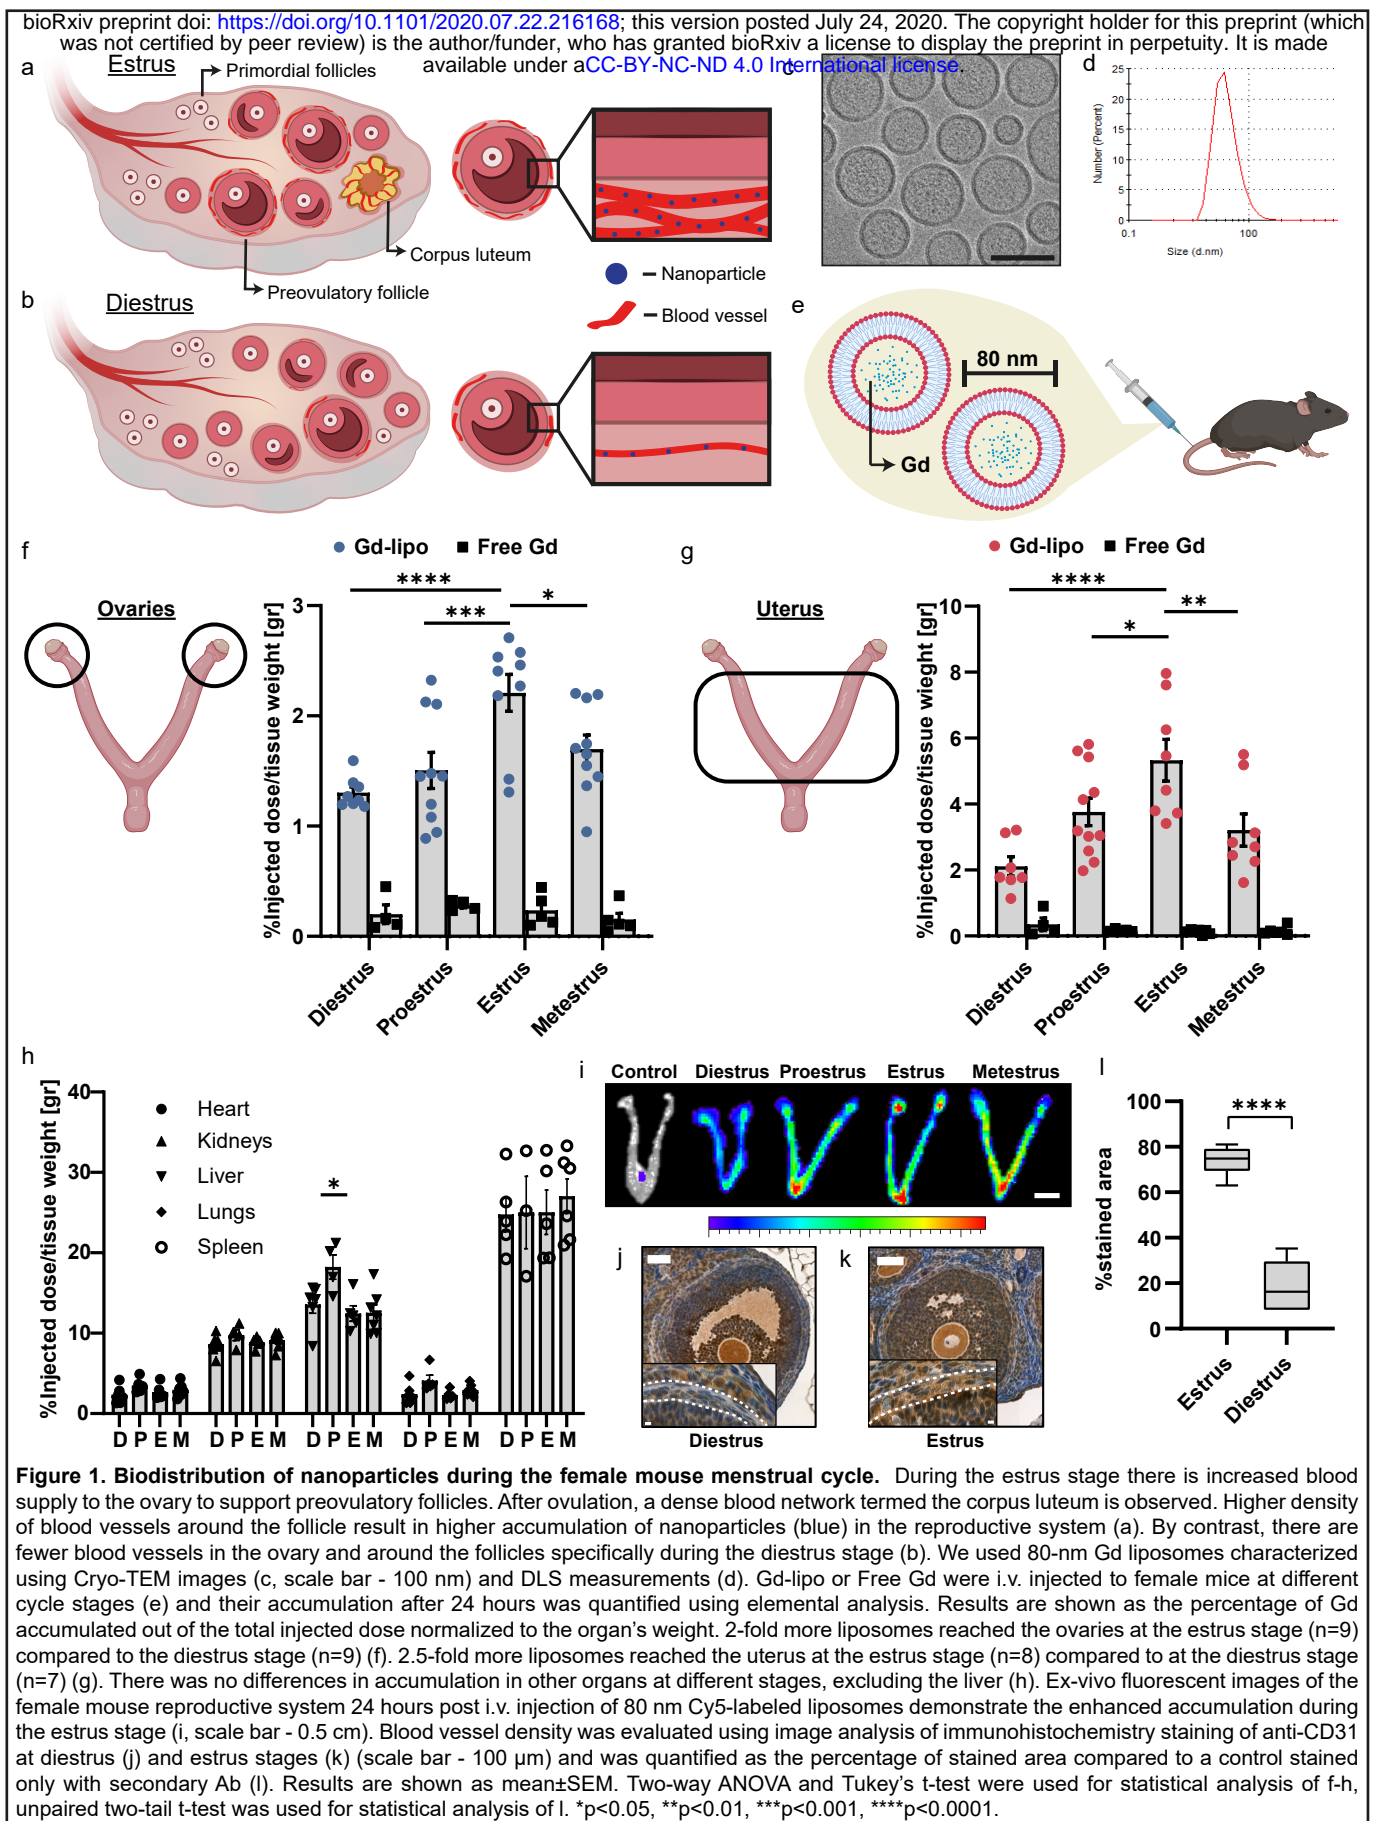

**Figure 1. Biodistribution of nanoparticles during the female mouse menstrual cycle.** During the estrus stage there is increased blood supply to the ovary to support preovulatory follicles. After ovulation, a dense blood network termed the corpus luteum is observed. Higher density of blood vessels around the follicle result in higher accumulation of nanoparticles (blue) in the reproductive system (a). By contrast, there are fewer blood vessels in the ovary and around the follicles specifically during the diestrus stage (b). We used 80-nm Gd liposomes characterized using Cryo-TEM images (c, scale bar - 100 nm) and DLS measurements (d). Gd-lipo or Free Gd were i.v. injected to female mice at different cycle stages (e) and their accumulation after 24 hours was quantified using elemental analysis. Results are shown as the percentage of Gd accumulated out of the total injected dose normalized to the organ's weight. 2-fold more liposomes reached the ovaries at the estrus stage (n=9) compared to the diestrus stage (n=9) (f). 2.5-fold more liposomes reached the uterus at the estrus stage (n=8) compared to at the diestrus stage (n=7) (g). There was no differences in accumulation in other organs at different stages, excluding the liver (h). Ex-vivo fluorescent images of the female mouse reproductive system 24 hours post i.v. injection of 80 nm Cy5-labeled liposomes demonstrate the enhanced accumulation during the estrus stage (i, scale bar - 0.5 cm). Blood vessel density was evaluated using image analysis of immunohistochemistry staining of anti-CD31 at diestrus (j) and estrus stages (k) (scale bar - 100  $\mu$ m) and was quantified as the percentage of stained area compared to a control stained only with secondary Ab (l). Results are shown as mean $\pm$ SEM. Two-way ANOVA and Tukey's t-test were used for statistical analysis of f-h, unpaired two-tail t-test was used for statistical analysis of l. \*p<0.05, \*\*p<0.01, \*\*\*p<0.001, \*\*\*\*p<0.0001.

bioRxiv preprint doi: <https://doi.org/10.1101/2020.07.22.216168>; this version posted July 24, 2020. The copyright holder for this preprint (which was not certified by peer review) is the author/funder, who has granted bioRxiv a license to display the preprint in perpetuity. It is made available under a [CC-BY-NC-ND 4.0 International license](#).

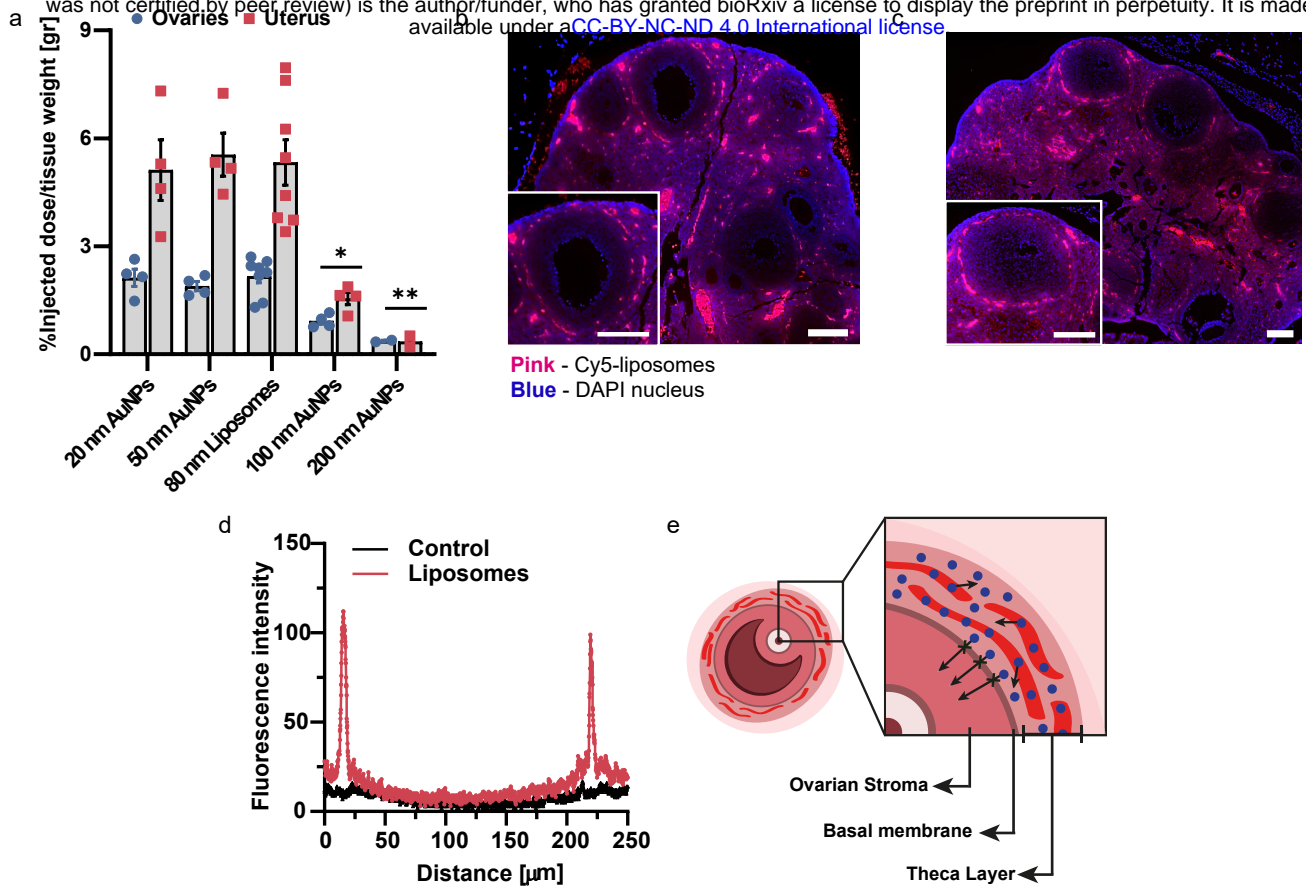

**Figure 2. Nanoparticles are localized around the follicles with size-dependent accumulation in the reproductive system.** Nanoparticles, 80-nm and smaller, show higher accumulation in the reproductive system, demonstrated by size dependent accumulation of gold nanoparticles in the ovaries (blue circles) and the uterus (red squares) 24 hour after i.v. injection during the estrus stage (n=4 for 20 nm, 50 nm and 100 nm; n=9 for 80 nm) (a). 80-nm liposomes do not cross the blood-follicle barrier as demonstrated by fluorescent histology images of cy5-labeled liposomes (pink) localization in the ovary (nuclei - blue) 24 hours after i.v. injection (b, c scale bar - 100  $\mu$ m). Line profile of the fluorescent intensity signal across a single follicle shows that the liposomes surround the follicle, indicated by two peaks in the dye signal (d). Illustration of the blood-follicle barrier shows the liposomes (blue) do not cross the basal membrane of the follicle and are restricted to the thecal layer around the follicle (e). Results are shown as mean $\pm$ SEM. Two-way ANOVA and Tukey's t-test were used for statistical analysis of e. \*p<0.05, \*\*p<0.01.

bioRxiv preprint doi: <https://doi.org/10.1101/2020.07.22.216168>; this version posted July 24, 2020. The copyright holder for this preprint (which was not certified by peer review) is the author/funder, who has granted bioRxiv a license to display the preprint in perpetuity. It is made available under aCC-BY-NC-ND 4.0 International license.

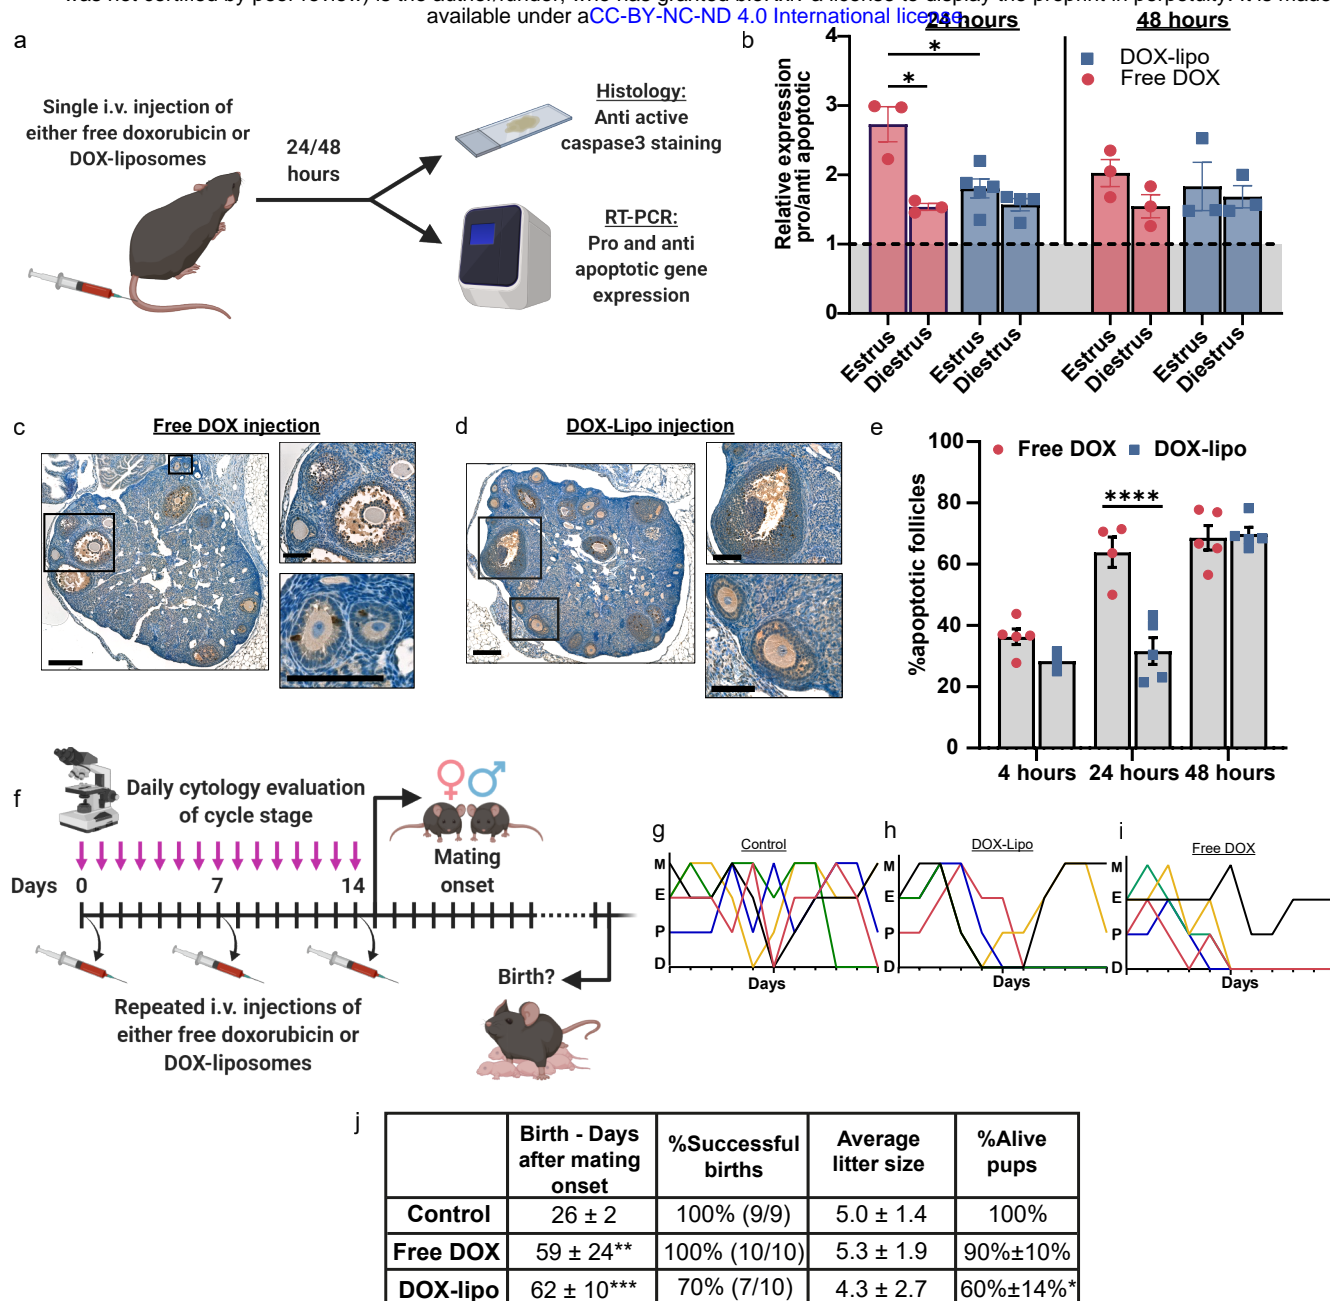

**Figure 3. Doxorubicin-loaded liposomes cause delayed ovarian toxicity and impair fertility compared to the free drug.** Healthy female mice received i.v. injection of either free DOX or DOX-lipo and the ovaries were taken to histology and RT-PCR analysis after 24 and 48 hours (a). RT-PCR of pro/anti apoptotic gene expression during estrus (24 hr, n=3 for free DOX n=5 for DOX-lipo. 48 hr, n=3 for both groups) and diestrus (24 hr, n=3 for free DOX n=4 for DOX-lipo. 48 hr, n=3 for both groups) are shown as the relative expression of the ratio between pro (BAX) and anti (bcl2) apoptotic genes (b). Immunohistochemistry of anti-active caspase3 24 hours after i.v. injection of either free DOX (c) or DOX-lipo (d) show apoptotic follicles (brown signal) with higher signal in the follicles in the free DOX group. Quantification of the total signal output from the follicles demonstrated significantly more follicles were damaged in the free DOX group (n=4) compared to DOX-lipo (n=5) 24 hours after i.v. injection, however apoptosis levels become comparable after 48 hours (n=5 for both groups) (e). Healthy female mice received repeated i.v. injections of either free DOX (n=10) or DOX-lipo (n=10) once a week for 3 treatments and their cycle stage was recorded daily to be compared to that of the control group (n=9) that was not injected (f). The estrous cycle in each group is demonstrated in graphs G-I where each line represents a single mouse. Mice in the DOX-lipo (h) and the free DOX (i) groups had a disrupted cycle compared to the control group (g). After the third injection, females were housed with males and the day of birth, litter size and pups' viability were recorded (j). The time until pregnancy was significantly longer for both the free DOX and the DOX-lipo group, however the pups' viability was lower for the DOX-lipo group. Results are shown as mean±SEM. Three-way ANOVA and Tukey's t-test (b), two-way ANOVA and Tukey's t-test (e and %alive pups in j) and Dunnett's T3 t-test (days until birth in j) were used for statistical analysis. \*p<0.05, \*\*p<0.01, \*\*\*p<0.001, \*\*\*\*p<0.0001.

bioRxiv preprint doi: <https://doi.org/10.1101/2020.07.22.216168>; this version posted July 24, 2020. The copyright holder for this preprint (which was not certified by peer review) is the author/funder, who has granted bioRxiv a license to display the preprint in perpetuity. It is made available under aCC-BY-NC-ND 4.0 International license.

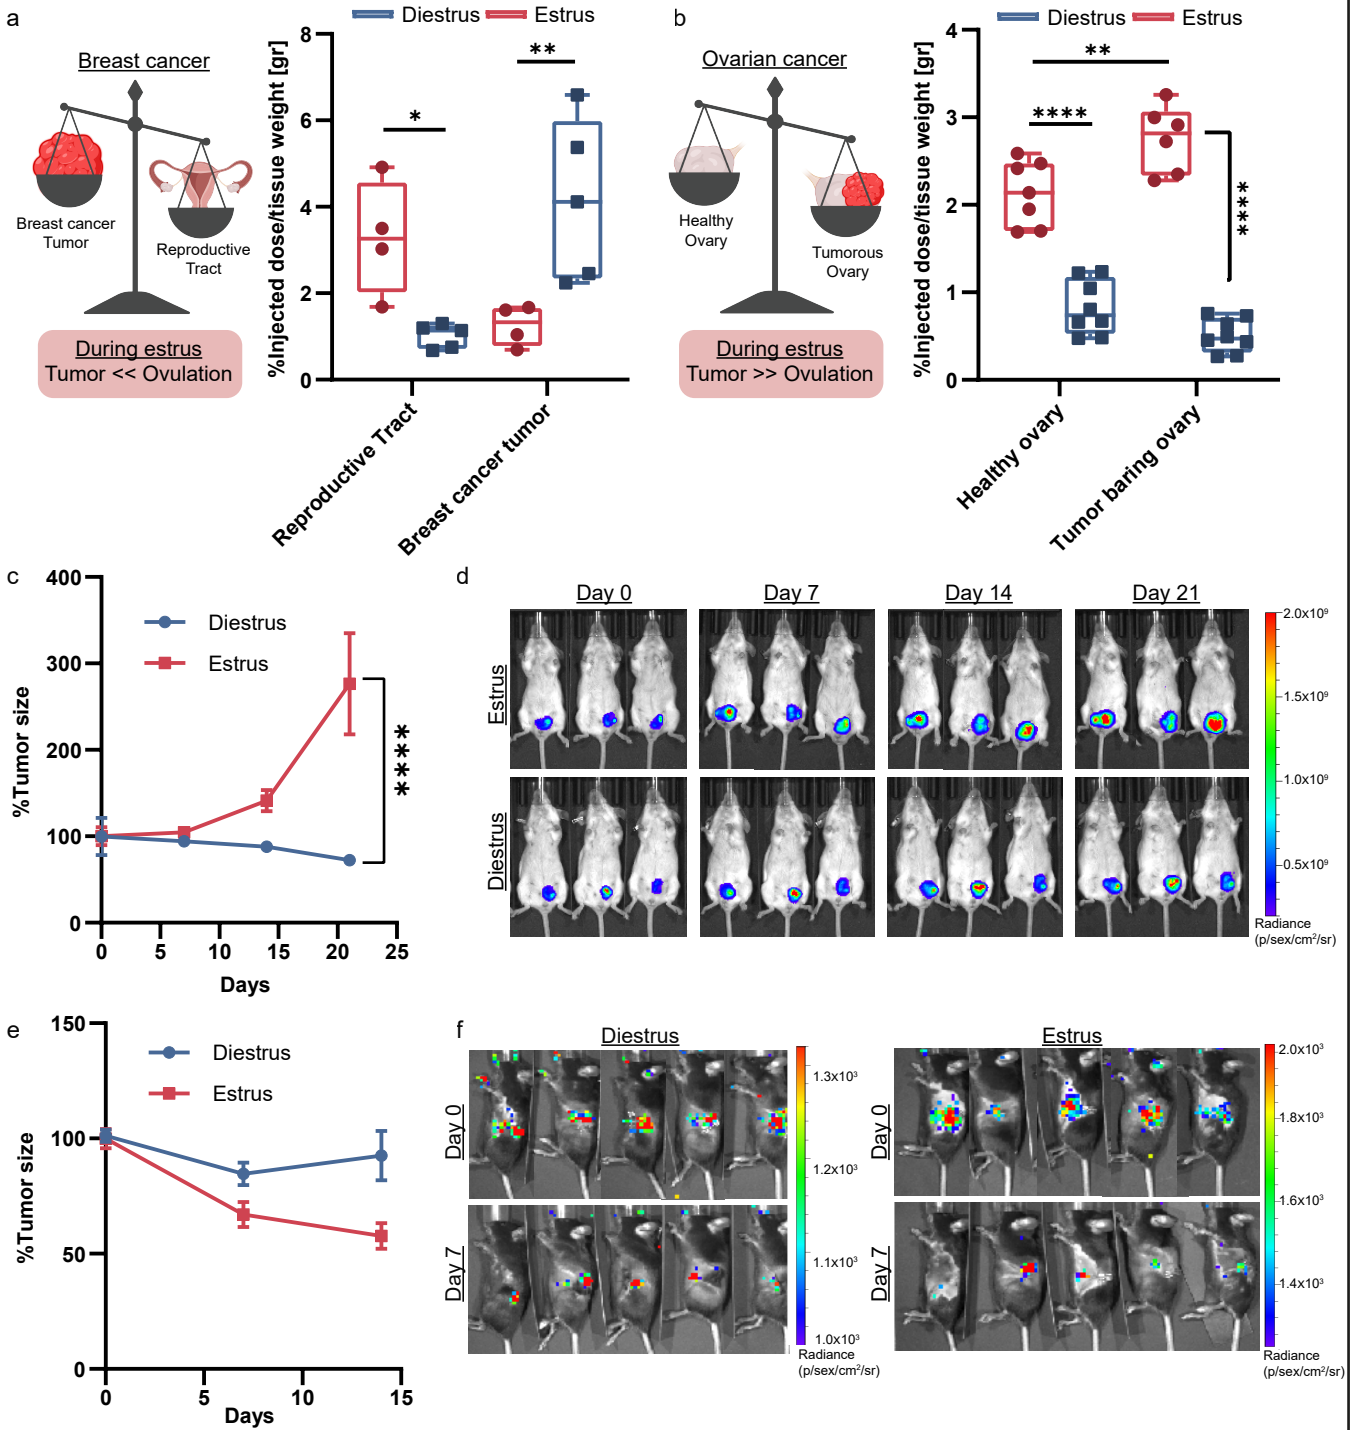

**Figure 4. Biodistribution of liposomes during cancer and cancer treatment efficacy are affected by the female mouse cycle.** During breast cancer tumor treatment, Gd-liposomes accumulate in the reproductive system (n=4) instead of at the site of the tumor (n=4) during the estrus stage, while during the diestrus stage they shift towards the tumor (n=5) and away from the reproductive system (n=5) (a). During ovarian cancer, there is increased accumulation of Gd-liposomes both in the tumor-bearing ovary (E. n=6, D. n=8) and in the healthy ovary (E. n=6, D. n=7) during estrus, compared to during diestrus stages (b). Treatment efficacy of DOX-lipo was evaluated in 4T1 mcherry breast cancer model during estrus (n=7) and diestrus (n=6) (c). IVIS images of 4T1 mcherry breast cancer tumor (top - treatment during estrus, bottom - treatment during diestrus) show 3 representative mice from each group (d). Treatment efficacy of DOX-lipo was evaluated in an ovarian cancer model expressing luciferase during estrus (n=5 (days 0 and 7), n=2 (day 14)) and diestrus (n=5 (days 0 and 7), n=3 (day 14)) (e). IVIS images of luminescent ovarian cancer tumor, left panel - treatment during diestrus, right panel - treatment during estrus (f). Results are shown as mean±SEM. Two-way ANOVA and Tukey's t-test were used for statistical analysis of a-c, e. \*\*p<0.01, \*\*\*p<0.001, \*\*\*\*p<0.0001.

## 223 **Materials and Methods**

### 224 **Estrous cycle and cytology**

225 Healthy 8-10 week old C57BL/6 female mice were housed 5 per cage in standard laboratory conditions  
226 and were exposed to 12 hours of light and 12 hours of dark. All animal experiments were approved by,  
227 and in compliance with, the institutional and ethical committee at the Technion. The animals' well-being  
228 was monitored regularly. Ovulation and cycle synchronization was achieved by mixing solid bedding  
229 from the cages of male mice with the bedding of the female mice cage for 2 days<sup>40</sup>. The estrous cycle  
230 stage of each female mouse was determined using the cytology method which was performed daily at the  
231 same time (7AM-9AM). Vaginal cytology is a common method for cycle stage evaluation by simply  
232 observing the different cell populations in stained vaginal smears taken from the vaginal opening of the  
233 mouse<sup>41</sup>. To collect a vaginal smear, 10 µl of sterile water were carefully pipetted on the vaginal opening  
234 and then placed on a glass slide to air dry. The dry smears were stained using Jorvet Dip Quick staining  
235 kit (Jorgensen Laboratories) and examined under a light microscope. The cycle stage was determined by  
236 observing the cell population (Figure S1A). Before experiment initiation, two consecutive estrous cycles  
237 were confirmed for each mouse.

### 238 **Gadolinium loaded liposomes preparation**

239 Gd liposomes were prepared as described before<sup>42</sup>. Briefly, a lipid mixture of hydrogenated soybean  
240 phosphatidylcholine (HSPC; Avanti Polar Lipids, Alabaster, AL, USA), cholesterol (Sigma-Aldrich,  
241 Rehovot, Israel) and 1,2-distearoyl-sn-glycero-3-phosphoethanolamine-N-methoxy-polyethylene glycol  
242 2000 (DSPE-PEG2000; Avanti Polar Lipids, Alabaster, AL, USA), in molar percentages of 56:39:5 was  
243 dissolved in pure ethanol at 70°C. The lipid mixture was injected into a Dulbecco's Phosphate Buffer  
244 Saline (PBS; Sigma-Aldrich, St. Louis, USA) solution containing 167 mg/ml of Gd-DTPA  
245 Diethylenetriaminepentaacetic acid gadolinium(III) dihydrogen salt hydrate (Gd; Sigma-Aldrich,  
246 Rehovot, Israel) to obtain a final lipid concentration of 50 mM. The liposomes were downsized to 80 nm  
247 using a Lipex extruder (Northern Lipids, Vancouver, Canada) at 65°C through 400, 200, 100, 80 and 50 nm  
248 Nuclepore polycarbonate membranes (Whatman, Newton, MA, USA). Free Gd-DTPA was removed using  
249 dialysis in a 12-14 kD membrane (Spectrum Laboratories, Inc., USA) against PBS (1:1000 volume ratio)  
250 at 4°C and exchanged three times. Average liposome size was measured using Zetasizer Nano ZSP

251 (Malvern Instruments, UK) in disposable polystyrene cuvette after liposomes were diluted 1:100 in PBS  
252 and Cryo-TEM was performed as described previously<sup>42</sup>.

### 253 **Cy5-labeled liposomes preparation**

254 Cy5-labeled liposomes were prepared in the same method as Gd-liposomes only without Gd added to the  
255 PBS solution. 1% molar percentage of DSPE-Cy5 was added to the lipid mixture before injection to PBS  
256 solution.

### 257 **Doxorubicin loaded liposomes preparation**

258 Doxorubicin (DOX, TEVA Israel) was actively loaded into a 80 nm liposome using the ammonium sulfate  
259 gradient method<sup>43</sup>. Lipid mixture of HSPC, cholesterol and DSPE-PEG2000 in molar percentages of  
260 56:39:5 respectively was dissolved in pure ethanol at 70°C. The dissolved lipids were injected into 120  
261 mM ammonium sulfate solution to reach a final concentration of 50 mM total lipids. The liposomes were  
262 downsized to 80 nm using an extruder at 70°C. Dialysis was performed in 12-14 kD dialysis membrane  
263 against 10% w/w sucrose and 10 mM histidine at pH 6.5 (1:1000 volume ratio) and exchanged three times.  
264 For active loading, DOX was dissolved in 10% w/w sucrose and added to the ammonium sulfate liposomes  
265 to reach a final concentration of 2 mg/ml. The mixture was placed in 70°C at 600 rpm for 1 hour. The dox  
266 loaded liposomes were dialyzed in 12-14 kD dialysis membrane against 10% w/w sucrose and 10 mM  
267 histidine pH 6.5 (1:1000 volume ratio) for 24 hours.

### 268 **Gd-liposomes biodistribution**

269 After determining the estrous cycle, 200 µl of Gd-liposomes were injected i.v. into the tail vein of healthy  
270 female mice. 24 hours after injection, the mice were sacrificed and the ovaries, uterus, kidneys, spleen,  
271 liver, heart, and lungs were collected and weighed. The organs were disintegrated to ash at 550°C for 5  
272 hours. The ashes were dissolved in 5 ml of 1% nitric acid and the mixture was filtered through 0.45 µm  
273 syringe filters and taken for ICP-OES analysis.

### 274 **Gold nanoparticles biodistribution**

275 20, 50 and 100 nm PEGylated gold nanoparticles were purchased from NanoCompasix (San Diego, CA,  
276 USA), and 200 nm PEGylated gold nanoparticles were purchased from NanoPartz (Loveland, CO, USA).  
277 After determining the estrous cycle, 100 µl of 1 mg/ml gold nanoparticles were injected i.v. into the tail

278 vein of healthy female mice. 24 hours after injection the mice were sacrificed and the ovaries and uterus  
279 were collected and weighed. The organs were dissolved overnight in Aqua-regia solution and then heated  
280 at 60°C for 1 hour. The dissolved organs were resuspended in double distilled water to reach acid  
281 concentration of 1%. The mixture was filtered through 0.45 µm syringe filters and taken for ICP-OES  
282 analysis.

### 283 **Elemental analysis of Gd and Au**

284 Gadolinium (Gd) and Gold (Au) samples were analyzed using inductive coupled plasma – optical  
285 emission spectroscopy 5110 ICP-OES (Agilent, CA, USA). Calibration curves for each element were  
286 obtained from a calibration standard (Sigma-Aldrich, Rehovot, Israel) diluted in 1% nitric acid. Gd  
287 emission was measured at 335.048 nm and 342.246 nm. Au emission was measured at 242.794 nm and  
288 267.594 nm. The concentration at each wavelength was calculated by the ICP-OES software according to  
289 the obtained calibration curve. The measurements from both wavelengths were averaged for each element.  
290 The obtained concentration was divided by the injected dose concentration to obtain the percentage out of  
291 the injected dose and then divided by the organ's weight for normalization.

### 292 ***Ex-vivo* IVIS imaging**

293 200 µl of Cy5 labeled liposomes were injected i.v. into the tail vein of healthy female mice after  
294 determining the estrous cycle stage. 24 hours after injection the mice were sacrificed and the reproductive  
295 system was imaged *ex-vivo* using the IVIS SpectrumCT Pre-Clinical *In-Vivo* Imaging System  
296 (PerkinElmer, MA, USA) at an excitation of 570 nm and emission of 620 nm, binning 8, f-stop 2 and 3  
297 seconds exposure. A control (not-injected) mouse was used for analysis. All images were analyzed using  
298 the LivingImage software.

### 299 **Fluorescent Histology analysis**

300 200 µl of Cy5 labeled liposomes were injected i.v. into the tail vein of healthy female mice after the estrous  
301 cycle stage was determined. 24 hours after injection the mice were sacrificed and the reproductive system  
302 was fixated using Formalin solution neutral buffered 10% histological tissue fixative (Sigma-Aldrich,  
303 Rehovot, Israel) at 4°C for at least 24 hour before embedding in paraffin and sectioned. Slides were  
304 deparaffinized in a xylene ethanol gradient as follows: soaked in xylene for 3 min, xylene/ethanol (1:1 vol  
305 ratio) for 3 min, absolute ethanol for 3 min, 95% ethanol for 3 min, 70% ethanol for 3 min, and 50%

306 ethanol for 3 min, and finally placed in tap water. Nuclei blue fluorescent staining was done using  
307 Invitrogen™ Molecular Probes™ NucBlue Fixed Cell ReadyProbes™ Reagent (Fisher Scientific,  
308 Waltham, MA, USA) incubated for 5 min followed by rinsing with tap water. The slides were imaged  
309 with Leica DMI8 inverted fluorescent microscope (Leica Microsystems GmbH, Wetzlar, Germany) using  
310 x40 magnification with exposure times of 400 ms for the DAPI channel and 900 ms for the Cy5 channel.

### 311 **Immunohistochemistry analysis**

312 Slides were deparaffinized in a xylene ethanol gradient as follows: soaked in xylene for 3 min,  
313 xylene/ethanol (1:1 vol ratio) for 3 min, absolute ethanol for 3 min, 95% ethanol for 3 min, 70% ethanol  
314 for 3 min, and 50% ethanol for 3 min, and finally placed in tap water. Antigen retrieval was done in 10  
315 mM tri-sodium citrate solution at pH 6 titrated with HCl. 2.5% ready-to-use normal goat serum (vector  
316 laboratories) was used for blocking. Incubation with primary antibody was at 4°C overnight with either  
317 anti-CD31 diluted 1:100 (ab28364, Abcam, Cambridge, MA, USA) or anti-active caspase3 diluted 1:100  
318 (ab2302, Abcam, Cambridge, MA, USA). For blocking of endogenous peroxidase activity, the slides were  
319 incubated for 30 minutes in 0.3% hydrogen peroxide solution and then washed in tap water before  
320 incubation with ready-to-use secondary goat anti-rabbit antibody conjugated to HRP (MP7451 kit, vector  
321 laboratories) for 40 minutes at room temperature. For color development, slides were incubated with DAB  
322 solution (SK4105 kit, vector laboratories) for 3 minutes, washed with tap water, and counter stained with  
323 hematoxylin. Slides were scanned using 3DHistech Panoramic 250 Flash III automated slide scanner  
324 (3DHistech, Budapest, Hungary) at x40 magnification.

### 325 **Apoptosis experiment**

326 Healthy female mice were divided into 3 groups: control, Dox-liposomes and free DOX. After  
327 determining the estrous cycle stage, mice were injected with 100 µl of 5 mg/kg of either Dox-liposomes  
328 or free DOX. The mice were sacrificed either after 24 or 48 hours and the reproductive system was taken  
329 for either mRNA extraction for RT-PCR or fixation in 10% Formalin solution neutral buffered  
330 histological tissue fixative for immunohistochemistry analysis.

### 331 **RT-PCR analysis**

332 mRNA was extracted from ovaries using NucleoSpin RNA kit (#740955.50, Macherey-Nagel, Germany)  
333 according to the manufacturer's protocol. mRNA was quantified by measuring absorbance at 260 nm with



334 a NanoQuant plate in an Infinite 200PRO plate reader (TECAN, Mannedorf, Switzerland). 400 ng of  
335 mRNA were used for cDNA synthesis in a 20 µl reaction volume using high-quality cDNA synthesis kit  
336 (PCR Biosystems, Wayne, PA, USA). Real-time PCR was performed on qRT-PCR CFX Bio-Rad machine  
337 (Bio-Rad laboratories, Hercules, CA, USA) using qPCR-BIO Fast qPCR SyGreen Blue Mix Hi-ROX (PCR  
338 Biosystems, Wayne, PA, USA). GAPDH gene was used as a house keeping gene for normalization.  
339 Primers sequences:

340 Bcl2- Forward-ATGCCTTTGTGGAAGTATATGGC Reverse-GGTATGCACCCAGAGTGATGC,  
341 BAX- Forward-TGAAGACAGGGGCCTTTTTG Reverse-AATTCGCCGGAGACTCG,  
342 GAPDH- Forward-TGCACCACCAACTGTTAG Reverse-GGATGCAGGGATGATGTTC.

### 343 **Mating experiment**

344 Healthy 8-10 weeks old C57BL/6 female mice were divided into 3 groups: control, free DOX and Dox-  
345 liposomes. The estrous cycle of all the mice was monitored daily. 5 mg/kg of either free DOX or Dox-  
346 liposomes were injected i.v. into the mice tail vein every 7 days for total of three injections per group (Day  
347 0, 7 and 14). After the third injection, 2 females were placed with a healthy C57BL/6 male and were  
348 allowed to mate. Pregnancy was monitored and the day of birth, number, viability and weight of pups  
349 were documented.

### 350 **Cell culture**

351 MOSE cells were kindly provided by Novocure Ltd. Triple negative breast cancer cells 4T1 mCherry cells  
352 were purchased from ATCC. Cells were mycoplasma free. MOSE-luc cells were cultured in Dulbecco's  
353 Modified Eagle Medium: Nutrient Mixture F-12 (DMEM-F12, Biological Industries, Israel)  
354 supplemented with 10% fetal bovine serum (FBS), 100 IU ml<sup>-1</sup> Penicillin, 100 µg ml<sup>-1</sup> Streptomycin and  
355 2 mM L-glutamine (Biological Industries) and grown at 37°C; 5% CO<sub>2</sub>. 4T1 mCherry cells were cultured  
356 in Roswell Park Memorial Institute medium (RPMI; Sigma-Aldrich, Rehovot, Israel) supplemented with  
357 10% FBS, 100 IU ml<sup>-1</sup> Penicillin, 100 µg ml<sup>-1</sup> Streptomycin and 2 mM L-glutamine and grown at 37°C;  
358 5% CO<sub>2</sub>. To detach the cells, they were first incubated in fresh medium for 1 hour, washed with PBS and  
359 incubated with trypsin for 5 minutes. The cells were collected by centrifugation at 200Xg for 5 minutes.  
360 The cell pellet was suspended in fresh medium and cell concentration was measured using a cell counter.

### 361 **Breast cancer model**

362 50  $\mu$ l of 250,000 4T1 mCherry cells were suspended in PBS and injected subcutaneously directly into the  
363 mammary fat pad of healthy 8-10 weeks old BALB/c female mice<sup>44</sup>. Tumor development was monitored  
364 using caliper measurements and IVIS *in-vivo* fluorescent imaging. The mice were treated either during  
365 estrus or diestrus stages with 6 mg/kg of Dox-liposomes once a week for 21 days.

### 366 **Orthotopic ovarian cancer model**

367 Healthy 8-10 week old C57BL/6 female mice were anesthetized using a mixture of 90 mg/kg ketamine  
368 and 10 mg/kg of xylazine and received 0.3 mg/kg of buprenorphine for pain relief. Small incisions in the  
369 skin and peritoneum were made in the back of the animal above the ovarian fat pad. The ovary was pulled  
370 out and held in place with a bulldog clip by the ovarian fat pad. Using a 30-gauge Hamilton syringe 10  $\mu$ l  
371 of 100,000 MOSE (expressing luciferase) cells suspended in equal parts of PBS and Matrigel were injected  
372 directly into the ovarian bursa. The ovary was placed gently back inside and the peritoneum was sutured  
373 using 7-0 absorbable stitches. The skin was closed using surgical clips. The animals were placed in a 37°C  
374 incubator until fully awake. Tumor development was monitored using D-luciferin injection (150 mg/kg)  
375 followed by IVIS *in-vivo* luminescence imaging. The mice were treated either during estrus or diestrus  
376 stages with 6 mg/kg of Dox-liposomes once a week for 14 days.

### 377 ***In-vivo* IVIS imaging**

378 Whole animal imaging was performed in the IVIS Spectrum CT Pre-Clinical *In-Vivo* Imaging System  
379 (PerkinElmer, MA, USA). For all imaging, the animals were placed under isoflurane anesthesia. 4T1  
380 mCherry tumors were imaged using fluorescent mCherry filter with the following settings: ex. 570 nm  
381 em. 620 nm, binning 4, f-stop 2 and exposure time 3 seconds. Ovarian luciferase expressing tumors were  
382 imaged using the luminescence setting with the following settings: open emission filter, binning 16, f-stop  
383 1 and exposure time of 180 seconds, 12 minutes after i.p injection of 150 mg/kg of D-luciferin. All images  
384 were analyzed using the LivingImage software.

### 385 **Statistical analysis**

386 All statistical analysis: student's t-test, two-way ANOVA and three-way ANOVA were performed using  
387 Prism GraphPad software.

388

## 389 References

- 390 1 Robinson, R. S. *et al.* Angiogenesis and vascular function in the ovary. *Reproduction* **138**, 869-881 (2009).  
391 2 Fraser, H. M. & Lunn, S. F. Regulation and manipulation of angiogenesis in the primate corpus luteum.  
392 *Reproduction* **121**, 355-362 (2001).  
393 3 Caligioni, C. S. Assessing reproductive status/stages in mice. *Current protocols in neuroscience* **48**, A. 4I.  
394 1-A. 4I. 8 (2009).  
395 4 Shamay, Y. *et al.* Quantitative self-assembly prediction yields targeted nanomedicines. *Nature Materials*  
396 **17**, 361-368, doi:10.1038/s41563-017-0007-z (2018).  
397 5 Aliprandi, A., Mauro, M. & De Cola, L. Controlling and imaging biomimetic self-assembly. *Nature*  
398 *Chemistry* **8**, 10-15, doi:10.1038/nchem.2383 (2016).  
399 6 Parameswaran, R. & Tian, B. Scalable breakthrough. *Nature Nanotechnology* **13**, 875-876,  
400 doi:10.1038/s41565-018-0248-2 (2018).  
401 7 Davis, H. C. *et al.* Mapping the microscale origins of magnetic resonance image contrast with subcellular  
402 diamond magnetometry. *Nature Communications* **9**, 131, doi:10.1038/s41467-017-02471-7 (2018).  
403 8 Hu, Q. *et al.* Conjugation of haematopoietic stem cells and platelets decorated with anti-PD-1 antibodies  
404 augments anti-leukaemia efficacy. *Nature Biomedical Engineering* **2**, 831-840, doi:10.1038/s41551-018-  
405 0310-2 (2018).  
406 9 Conde, J., Oliva, N., Zhang, Y. & Artzi, N. Local triple-combination therapy results in tumour regression  
407 and prevents recurrence in a colon cancer model. *Nature Materials* **15**, 1128-1138, doi:10.1038/nmat4707  
408 (2016).  
409 10 Yong, T. *et al.* Tumor exosome-based nanoparticles are efficient drug carriers for chemotherapy. *Nature*  
410 *Communications* **10**, 3838, doi:10.1038/s41467-019-11718-4 (2019).  
411 11 Zahedi, P., Yoganathan, R., Piquette-Miller, M. & Allen, C. Recent advances in drug delivery strategies for  
412 treatment of ovarian cancer. *Expert opinion on drug delivery* **9**, 567-583 (2012).  
413 12 Anselmo, A. C. & Mitragotri, S. Nanoparticles in the clinic: An update. *Bioengineering & Translational*  
414 *Medicine* **4**, e10143 (2019).  
415 13 Shapiro, C. L., Manola, J. & Leboff, M. Ovarian failure after adjuvant chemotherapy is associated with  
416 rapid bone loss in women with early-stage breast cancer. *Journal of Clinical Oncology* **19**, 3306-3311  
417 (2001).  
418 14 Barkalina, N., Charalambous, C., Jones, C. & Coward, K. Nanotechnology in reproductive medicine:  
419 emerging applications of nanomaterials. *Nanomedicine: Nanotechnology, Biology and Medicine* **10**, e921-  
420 e938 (2014).  
421 15 Lloyd-Parry, O., Downing, C., Aleisaei, E., Jones, C. & Coward, K. Nanomedicine applications in women's  
422 health: state of the art. *International journal of nanomedicine* **13**, 1963 (2018).  
423 16 N'Dea, S., Nelson, K. M., Gleghorn, J. P. & Day, E. S. Design of nanomaterials for applications in  
424 maternal/fetal medicine. *Journal of Materials Chemistry B* (2020).  
425 17 Ferretti, M. T. *et al.* Sex differences in Alzheimer disease—the gateway to precision medicine. *Nature*  
426 *Reviews Neurology* **14**, 457-469 (2018).  
427 18 Lai, S. K., Wang, Y.-Y., Hida, K., Cone, R. & Hanes, J. Nanoparticles reveal that human cervicovaginal  
428 mucus is riddled with pores larger than viruses. *Proceedings of the National Academy of Sciences* **107**, 598-  
429 603 (2010).  
430 19 Ferber, S., Gonzalez, R. J., Cryer, A. M., von Andrian, U. H. & Artzi, N. Immunology-Guided Biomaterial's  
431 Design as Mucosal Cancer Vaccine. *Advanced Materials*, 1903847 (2019).  
432 20 Huang, X. *et al.* Protein nanocages that penetrate airway mucus and tumor tissue. *Proceedings of the*  
433 *National Academy of Sciences* **114**, E6595-E6602, doi:10.1073/pnas.1705407114 (2017).  
434 21 La-Beck, N. *et al.* The evaluation of gender on the pharmacokinetics (PK) of pegylated liposomal anticancer  
435 agents. *Journal of Clinical Oncology* **28**, e13003-e13003 (2010).

- 436 22 Serpooshan, V. *et al.* Effect of cell sex on uptake of nanoparticles: the overlooked factor at the nanobio  
437 interface. *ACS nano* **12**, 2253-2266 (2018).
- 438 23 Mora-Raimundo, P., Lozano, D., Manzano, M. & Vallet-Regí, M. Nanoparticles to knockdown  
439 osteoporosis-related gene and promote osteogenic marker expression for osteoporosis treatment. *ACS nano*  
440 **13**, 5451-5464 (2019).
- 441 24 Rosenblum, D., Joshi, N., Tao, W., Karp, J. M. & Peer, D. Progress and challenges towards targeted  
442 delivery of cancer therapeutics. *Nature communications* **9**, 1-12 (2018).
- 443 25 Conriot, J. *et al.* Immunization with mannosylated nanovaccines and inhibition of the immune-suppressing  
444 microenvironment sensitizes melanoma to immune checkpoint modulators. *Nature Nanotechnology* **14**,  
445 891-901, doi:10.1038/s41565-019-0512-0 (2019).
- 446 26 Zhong, Y. *et al.* Hyaluronic acid-shelled acid-activatable paclitaxel prodrug micelles effectively target and  
447 treat CD44-overexpressing human breast tumor xenografts in vivo. *Biomaterials* **84**, 250-261 (2016).
- 448 27 Chen, K. & Arnold, F. H. Engineering new catalytic activities in enzymes. *Nature Catalysis* **3**, 203-213,  
449 doi:10.1038/s41929-019-0385-5 (2020).
- 450 28 Tsuchiya, Y., Nakajima, M. & Yokoi, T. Cytochrome P450-mediated metabolism of estrogens and its  
451 regulation in human. *Cancer letters* **227**, 115-124 (2005).
- 452 29 Tamanini, C. & De Ambrogi, M. Angiogenesis in developing follicle and corpus luteum. *Reproduction in*  
453 *Domestic Animals* **39**, 206-216 (2004).
- 454 30 Weis, S. M. & Cheresch, D. A. Pathophysiological consequences of VEGF-induced vascular permeability.  
455 *Nature* **437**, 497-504 (2005).
- 456 31 Raemdonck, K. & De Smedt, S. C. Lessons in simplicity that should shape the future of drug delivery.  
457 *Nature Biotechnology* **33**, 1026-1027, doi:10.1038/nbt.3366 (2015).
- 458 32 Russell, D. L. & Robker, R. L. Molecular mechanisms of ovulation: co-ordination through the cumulus  
459 complex. *Human reproduction update* **13**, 289-312 (2007).
- 460 33 Zhou, H. *et al.* Involvement of follicular basement membrane and vascular endothelium in blood–follicle  
461 barrier formation of mice revealed by ‘in vivo cryotechnique’. *Reproduction* **134**, 307-317 (2007).
- 462 34 Hazzard, T. M. & Stouffer, R. L. Angiogenesis in ovarian follicular and luteal development. *Best Practice*  
463 *& Research Clinical Obstetrics & Gynaecology* **14**, 883-900 (2000).
- 464 35 Bar-Joseph, H. *et al.* Doxorubicin-induced apoptosis in germinal vesicle (GV) oocytes. *Reproductive*  
465 *toxicology* **30**, 566-572 (2010).
- 466 36 Syrigos, K. N., Vile, R. G., Peters, A. M. & Harrington, K. J. Biodistribution and pharmacokinetics of  
467 <sup>111</sup>In-DTPA-labelled pegylated liposomes after intraperitoneal injection. *Acta Oncologica* **42**, 147-153  
468 (2003).
- 469 37 Barenholz, Y. Shake up the drug containers. *Nature nanotechnology* **7**, 483-484 (2012).
- 470 38 Akinc, A. *et al.* The Onpatro story and the clinical translation of nanomedicines containing nucleic acid-  
471 based drugs. *Nature Nanotechnology* **14**, 1084-1087, doi:10.1038/s41565-019-0591-y (2019).
- 472 39 Humphries, C. Luck of the chromosomes. *Nature* **516**, S10 (2014).
- 473 40 Jemiolo, B., Harvey, S. & Novotny, M. Promotion of the Whitten effect in female mice by synthetic analogs  
474 of male urinary constituents. *Proceedings of the National Academy of Sciences* **83**, 4576-4579 (1986).
- 475 41 Byers, S. L., Wiles, M. V., Dunn, S. L. & Taft, R. A. Mouse estrous cycle identification tool and images.  
476 *PloS one* **7**, e35538 (2012).
- 477 42 Zinger, A. *et al.* Collagenase nanoparticles enhance the penetration of drugs into pancreatic tumors. *ACS*  
478 *nano* **13**, 11008-11021 (2019).
- 479 43 Haran, G., Cohen, R., Bar, L. K. & Barenholz, Y. Transmembrane ammonium sulfate gradients in  
480 liposomes produce efficient and stable entrapment of amphipathic weak bases. *Biochimica et Biophysica*  
481 *Acta (BBA)-Biomembranes* **1151**, 201-215 (1993).
- 482 44 Arroyo-Crespo, J. J. *et al.* Characterization of triple-negative breast cancer preclinical models provides  
483 functional evidence of metastatic progression. *International Journal of Cancer* **145**, 2267-2281,  
484 doi:10.1002/ijc.32270 (2019).

485
